# Supplementary figures and images for: Interdependence of Molecular Lesions That Drive Uveal Melanoma Metastasis
Source: MDPI journal article supplement (doi:10.3390/ijms242115602), 2023-10-26

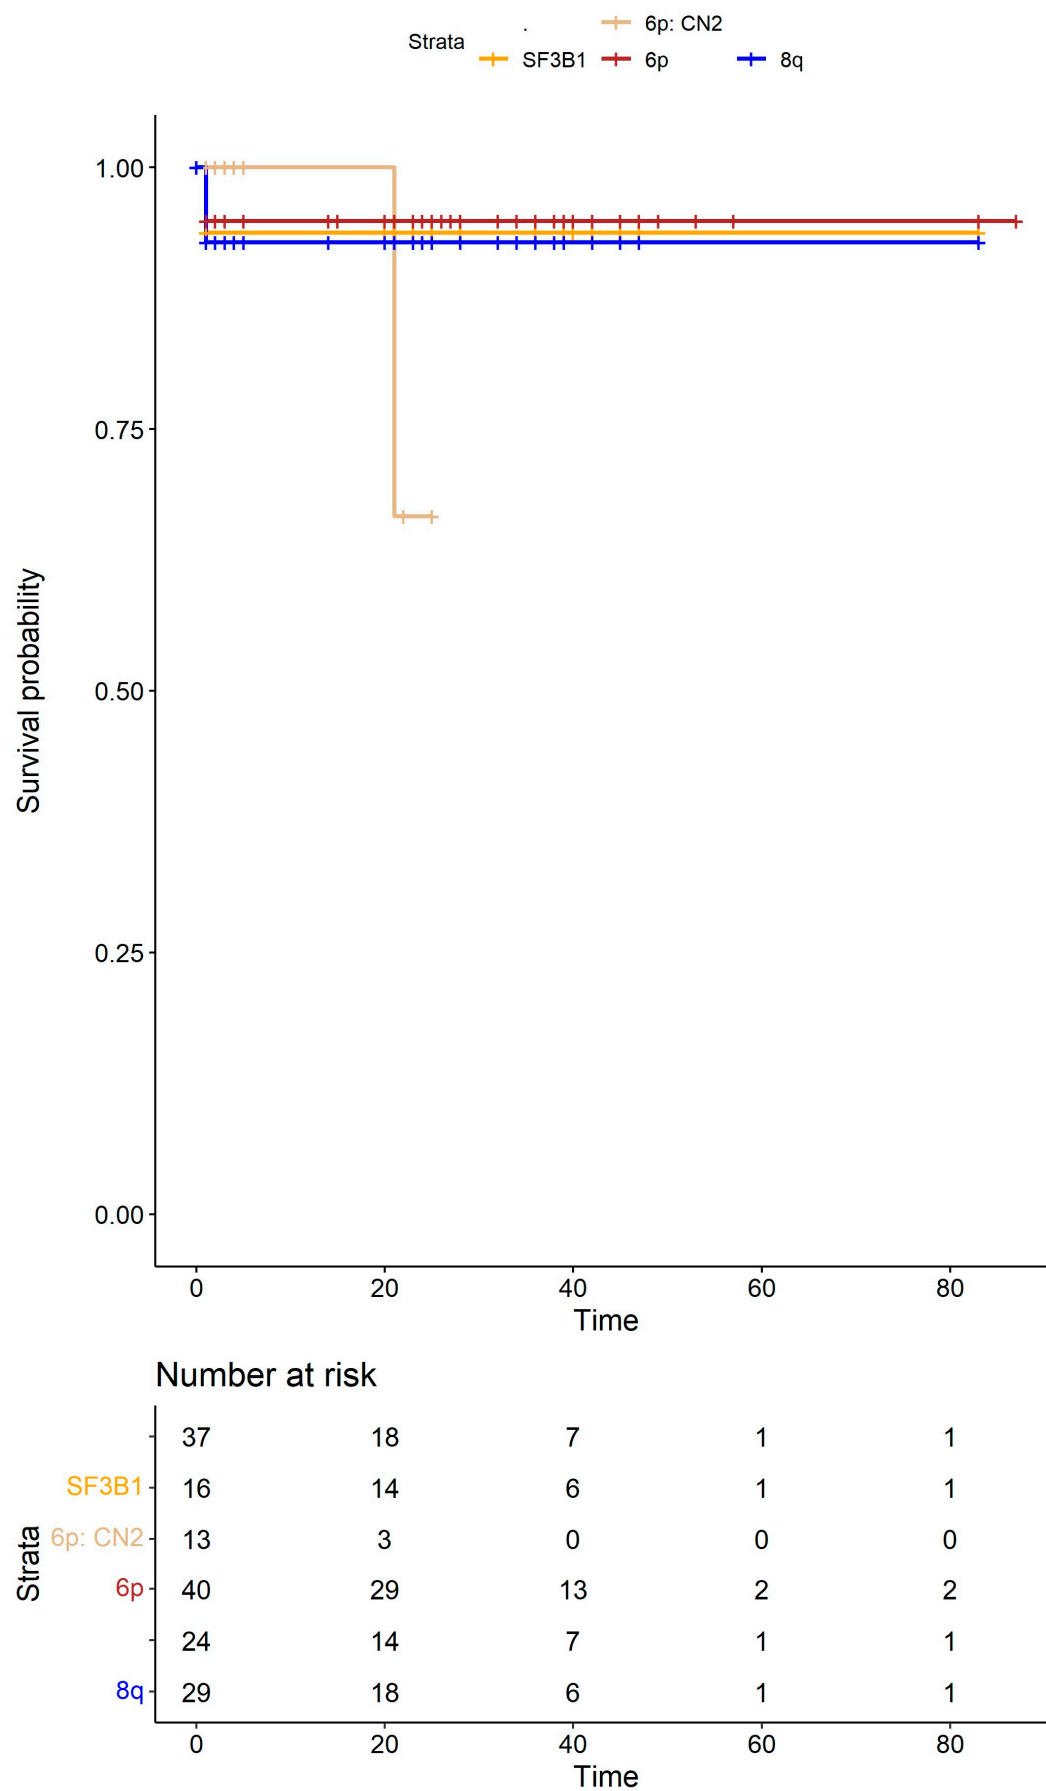

**Figure S1:** Survival curves of genomic factors in disomic patients.

Supplement: s1 [file s1]
